# Supplementary material for: Self-supporting nano-porous carbon nanosheet with organized sp2-C network for unprecedented catalytic performance in room-temperature H2S oxidization
Source: Royal Society of Chemistry journal article supplement (doi:10.1039/d3ta00822c), 2023-01-01
Supplement: d3ta00822c1.pdf [file d3ta00822c1.pdf]

## Electronic Supplementary Information

# **Self-supporting Nano-porous Carbon Nanosheet with Organized $sp^2$ -C Network for Unprecedented Catalytic Performance in Room-temperature $H_2S$ Oxidization**

*Feng Hu, ‡<sup>a</sup> Huan Chen, ‡<sup>a</sup> Zhengliang Zhang,<sup>a</sup> Bo Niu,<sup>a</sup> Yayun zhang <sup>\*ab</sup> and Donghui Long <sup>\*ab</sup>*

<sup>a</sup> State Key Laboratory of Chemical Engineering, East China University of Science and Technology, Shanghai 200237, China.

<sup>b</sup> Key Laboratory for Specially Functional Materials and Related Technology of the Ministry of Education, School of Chemical Engineering, East China University of Science and Technology, Shanghai 200237, China

\* Corresponding authors:

E-mail: yy.zhang@ecust.edu.cn (Yayun Zhang);

longdh@mail.ecust.edu.cn (Donghui Long)

‡ These authors contributed equally to this work

**ABSTRACT:** Graphene-based carbons have emerged promising applications in non-metal catalysis, but is challenged by interlayer stack and poor porosity. Herein, the concept of graphene-liked carbons is proposed with porous carbon nanosheets (PCNs) being prepared via a melt-foaming strategy. PCNs show abundant pore structure and organized sp<sup>2</sup>-C network around nanopores. Moreover, the robust and curved nanosheet keeps spatially isolated and is thus totally stack free. The unimpeded accessibility to functional groups, defects and sp<sup>2</sup>-C network enables PCNs with outstanding activity of activating oxygen and high compatibility as carbon support. Thus, alkali-modified PCNs present appalling catalytic oxidation of hydrogen sulfide with unprecedented sulfur capacity up to 10.7g H<sub>2</sub>S /g catalyst, 3-fold than that of graphene-based benchmark counterparts. This study provides new insight into the rational design of next-generation carbon catalyst, opening up exciting opportunities for diverse applications.

## **Table of Contents**

|                               |    |
|-------------------------------|----|
| 1. Supplementary Figures..... | 4  |
| 2. Supplementary Tables.....  | 16 |
| Reference: .....              | 20 |

## 1. Supplementary Figures

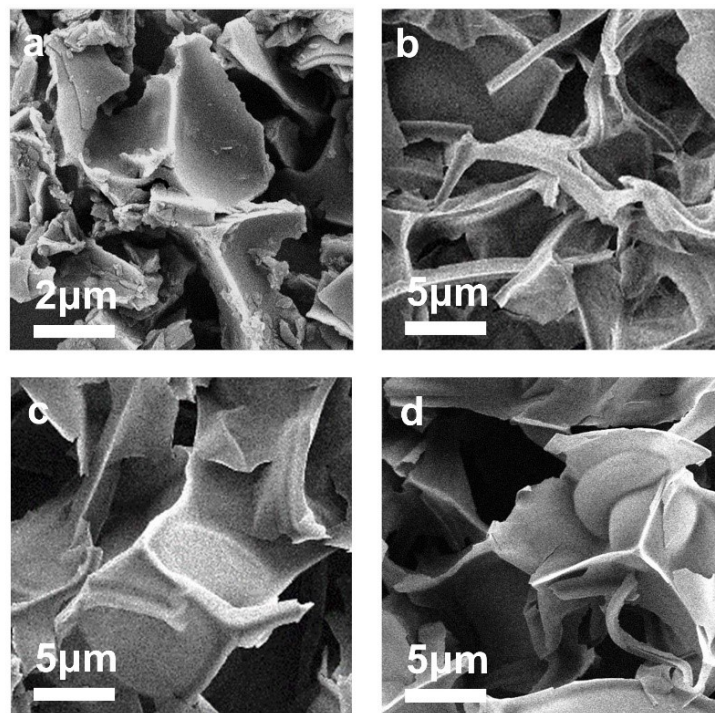

**Figure S1.** SEM images of (a) PCNs-400, (b) PCNs-500, (c) PCNs-600, (d) PCNs-700.

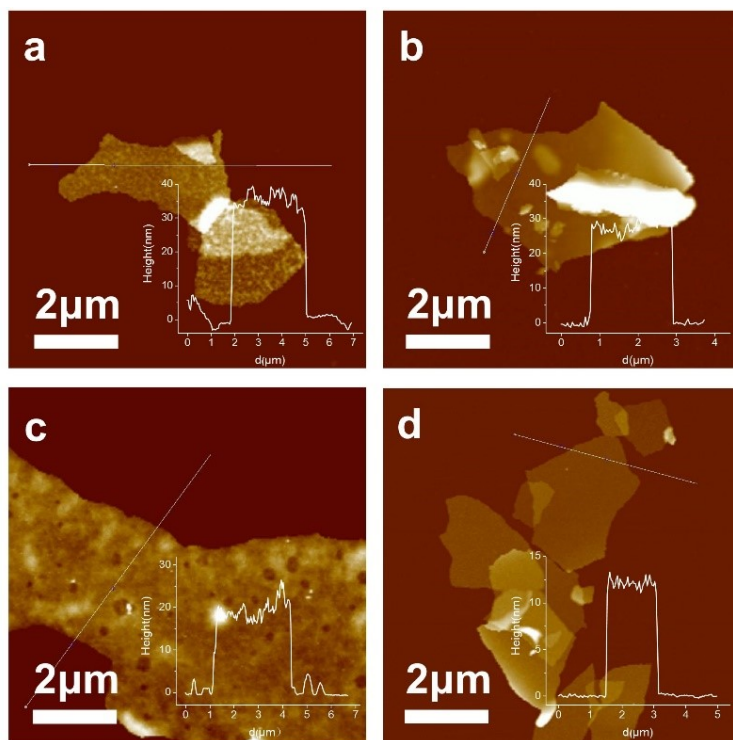

**Figure S2.** AFM images of (a) PCNs-400, (b) PCNs-500, (c) PCNs-600, (d) PCNs-700.

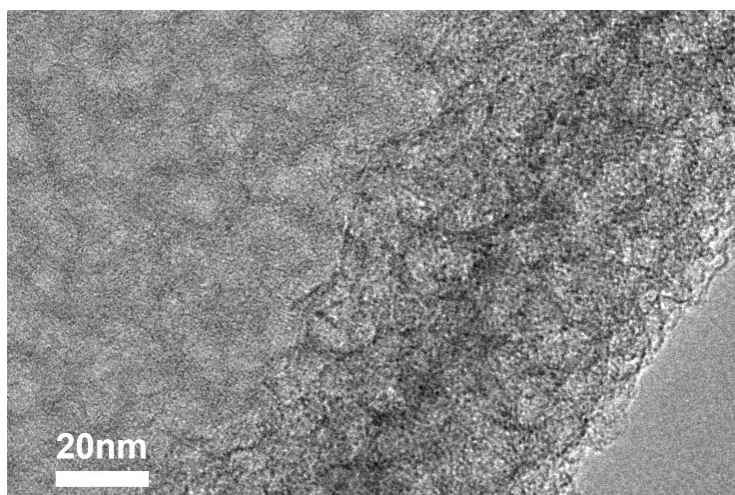

**Figure S3.** TEM images of PCNs-600.

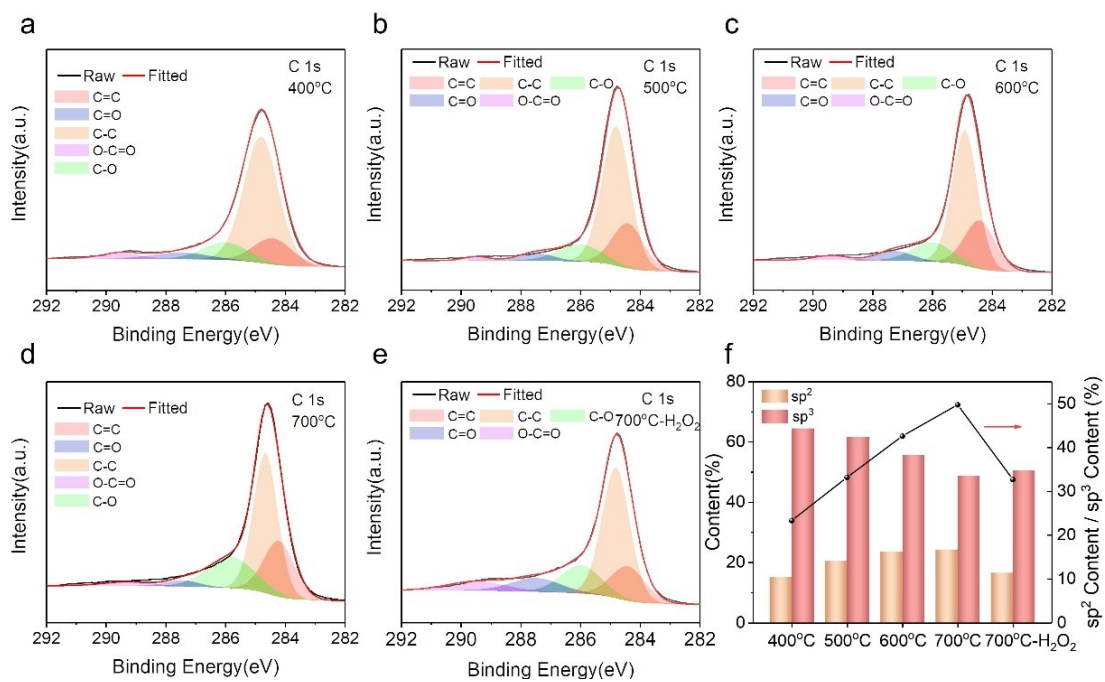

**Figure S4.** XPS of C1s of (a) PCNs-400, (b) PCNs-500, (c) PCNs-600, (d) PCNs-700, (e) PCNs-700-H<sub>2</sub>O<sub>2</sub>. (f) sp<sup>2</sup>-C, sp<sup>3</sup>-C content, and their ratio of PCNs-T.

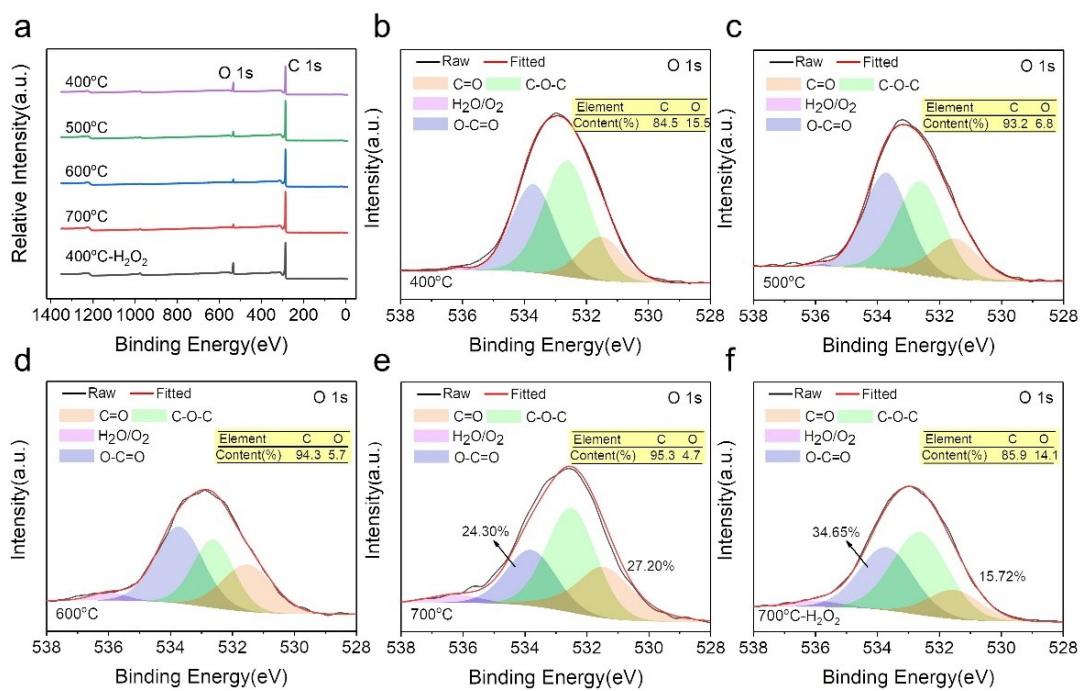

**Figure S5.** (a) XPS full spectrum of PCNs-T. XPS of O1s of (b) PCNs-400, (c) PCNs-500, (d) PCNs-600, (e) PCNs-700, (f) PCNs-700-H<sub>2</sub>O<sub>2</sub>.



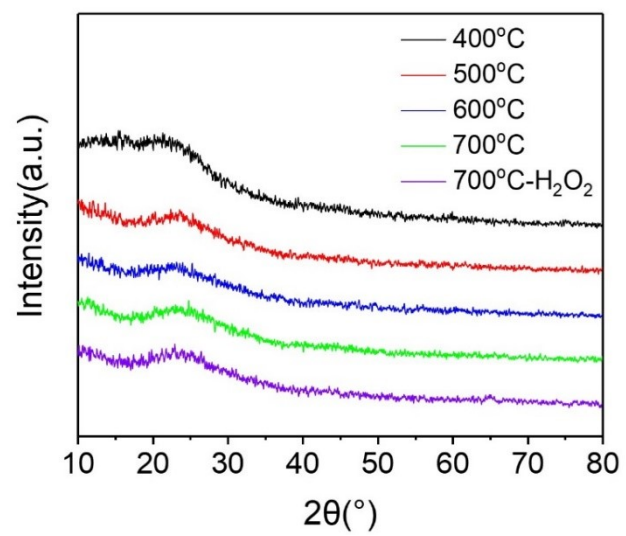

**Figure S6.** The XRD patterns of PCNs-T.

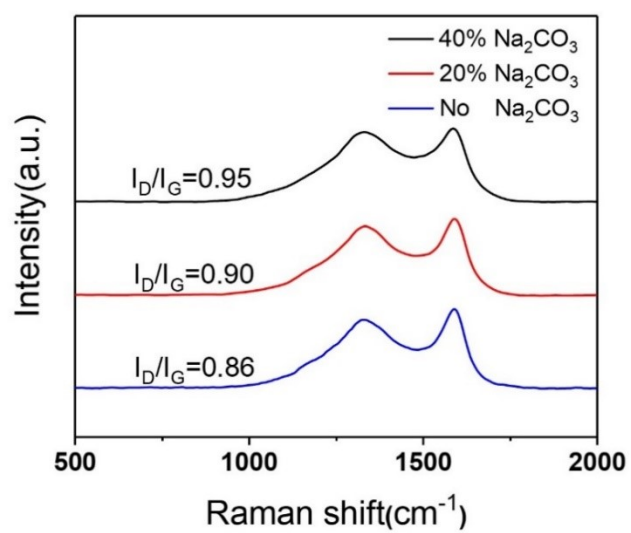

**Figure S7.** The Raman spectra of PCNs-700-x.

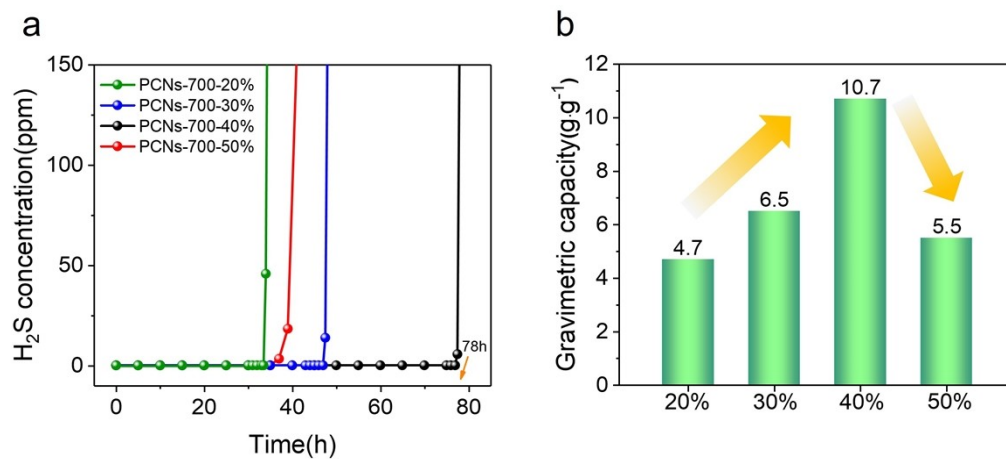

**Figure S8.** (a) Breakthrough curves and (b) the corresponding breakthrough sulfur capacities of PCNs-700 with different  $\text{Na}_2\text{CO}_3$  loadings under  $\text{O}_2/\text{H}_2\text{S}=10:1$ .

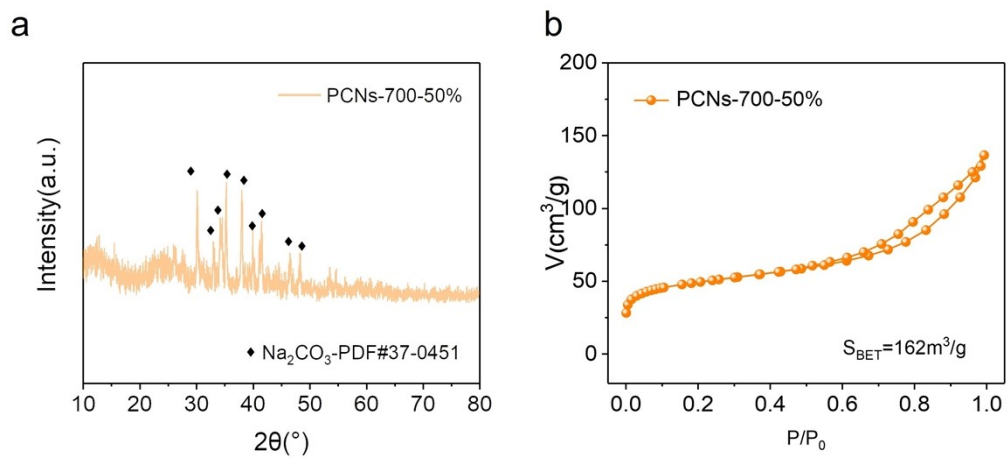

**Figure S9.** (a) The XRD patterns and (b)  $\text{N}_2$  adsorption-desorption isotherms of PCNs-700-50%

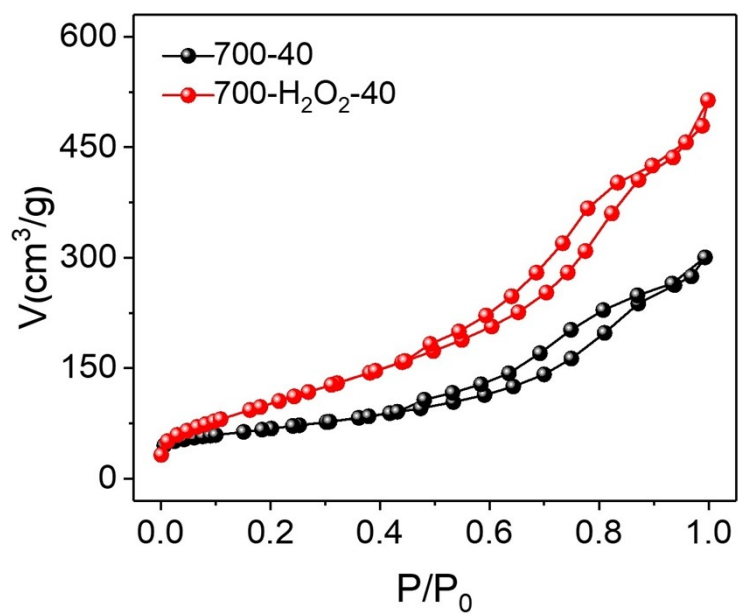

**Figure S10.** N<sub>2</sub> adsorption-desorption isotherms of PCNs-700-40% and PCNs-700-H<sub>2</sub>O<sub>2</sub>-40%.

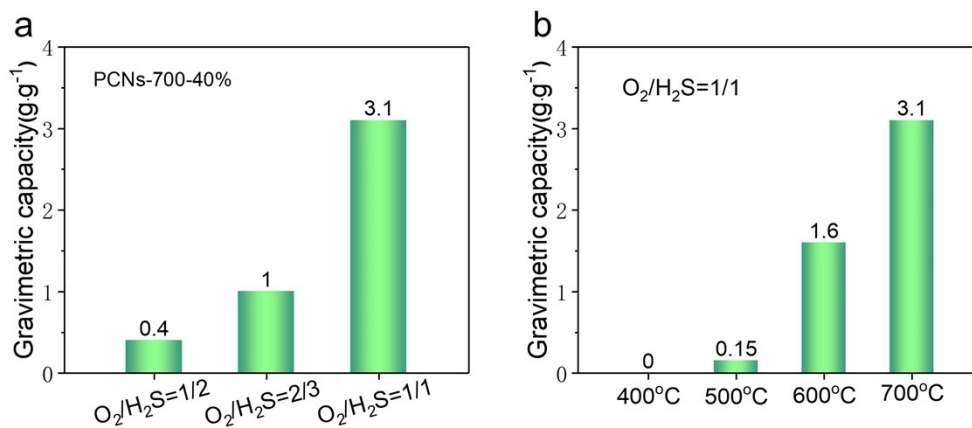

**Figure S11.** (a) Breakthrough capacity of PCNs-700-40% under different ratio of  $\text{O}_2$  to  $\text{H}_2\text{S}$ . (b) Breakthrough capacity of PCNs-T-40% under  $\text{O}_2/\text{H}_2\text{S}=1:1$ .

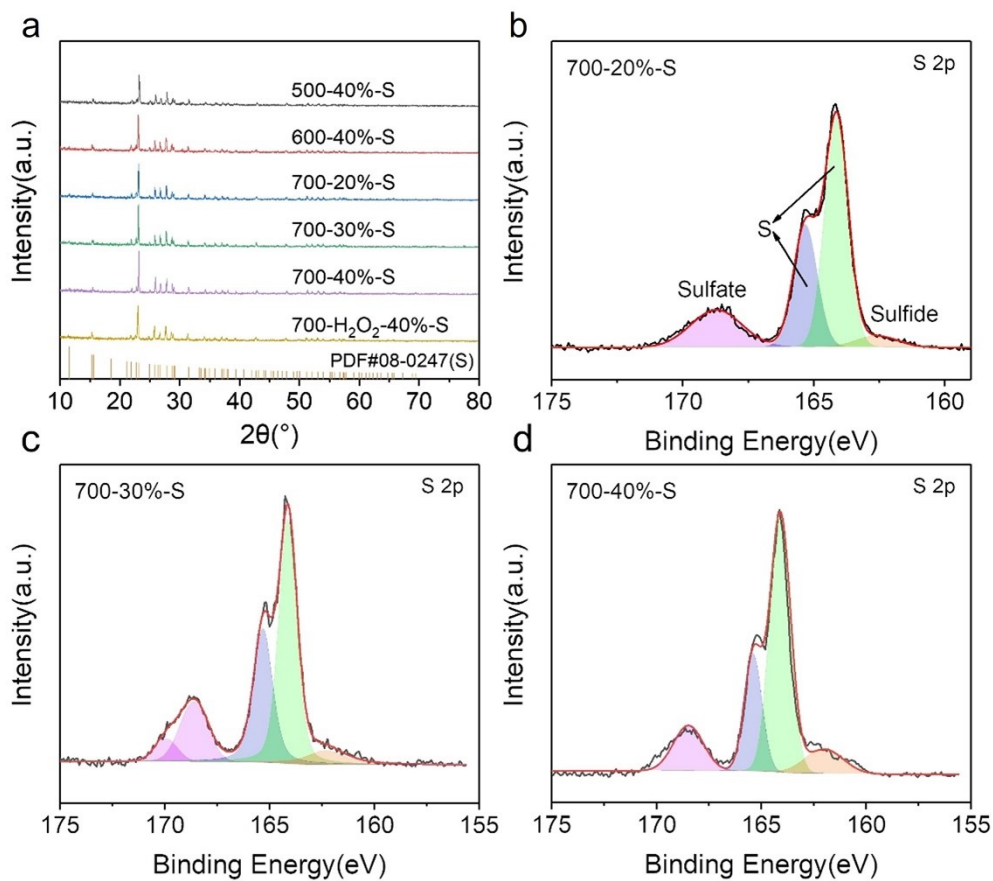

**Figure S12.** (a) The XRD patterns of PCNs-T-x-S. XPS of S 2p of (b)PCNs-700-20%-S, (c) PCNs-700-30%-S, (d) PCNs-700-40%-S.

## 2. Supplementary Tables

**Table S1.** Surface area and porosity properties of all PCNs-T.

| Sample                                  | $S_{\text{BET}}^{\text{a}}(\text{m}^2/\text{g})$ | $V_{\text{t}}^{\text{b}}(\text{cm}^3/\text{g})$ | $S_{\text{mic}}^{\text{c}}(\text{m}^2/\text{g})$ | $V_{\text{mic}}^{\text{d}}(\text{cm}^3/\text{g})$ |
|-----------------------------------------|--------------------------------------------------|-------------------------------------------------|--------------------------------------------------|---------------------------------------------------|
| PCNs-400                                | 48                                               | 0.16                                            | -                                                | -                                                 |
| PCNs-500                                | 406                                              | 0.5                                             | 42                                               | 0.02                                              |
| PCNs-600                                | 536                                              | 0.68                                            | 226                                              | 0.12                                              |
| PCNs-700                                | 768                                              | 1.36                                            | 107                                              | 0.05                                              |
| PCNs-700 -H <sub>2</sub> O <sub>2</sub> | 585                                              | 1.05                                            | 40                                               | 0.02                                              |

<sup>a</sup> Specific surface area calculated by using multipoint BET theory.

<sup>b</sup> Total pore volume calculated from nitrogen physisorption isotherm at  $p/p_0=0.99$ .

<sup>c,d</sup> Micropore specific surface area and pore volume calculated by using t-plot method.



**Table S2.** Relative contents of different oxygen-containing groups in O1s spectra.

|                                        | <b>C=O</b> | <b>C-O-C</b> | <b>O-C=O</b> | <b>H<sub>2</sub>O/O<sub>2</sub></b> |
|----------------------------------------|------------|--------------|--------------|-------------------------------------|
| PCNs-400°C                             | 17.20%     | 48.85%       | 33.54%       | 0.41%                               |
| PCNs-500°C                             | 18.01%     | 40.93%       | 40.42%       | 0.64%                               |
| PCNs-600°C                             | 26.27%     | 30.52%       | 40.00%       | 3.21%                               |
| PCNs-700°C                             | 27.20%     | 25.15%       | 44.30%       | 3.35%                               |
| PCNs-700-H <sub>2</sub> O <sub>2</sub> | 15.72%     | 46.59%       | 34.65%       | 3.03%                               |

**Table S3.** Surface area and porosity properties of all PCNs-T-40%.

| <b>Sample</b>                               | <b>S<sub>BET</sub>(m<sup>2</sup>/g)</b> | <b>V<sub>t</sub> (cm<sup>3</sup>/g)</b> | <b>S<sub>mic</sub>(m<sup>2</sup>/g)</b> | <b>V<sub>mic</sub> (cm<sup>3</sup>/g)</b> |
|---------------------------------------------|-----------------------------------------|-----------------------------------------|-----------------------------------------|-------------------------------------------|
| PCNs-400-40%                                | 27                                      | 0.12                                    | -                                       | -                                         |
| PCNs-500-40%                                | 105                                     | 0.16                                    | -                                       | -                                         |
| PCNs-600-40%                                | 302                                     | 0.37                                    | 11                                      | 0.01                                      |
| PCNs-700-40%                                | 238                                     | 0.46                                    | 40                                      | 0.02                                      |
| PCNs-700-H <sub>2</sub> O <sub>2</sub> -40% | 246                                     | 0.49                                    | 30                                      | 0.01                                      |

**Table S4.** Recently reported carbon-based catalysts for H<sub>2</sub>S oxidation.

| No. | Catalyst                                                                     | <sup>a</sup> C <sub>H<sub>2</sub>S</sub><br>(ppm ) | <sup>b</sup> t(°C) | <sup>c</sup> O <sub>2</sub> (%) | <sup>d</sup> WHSV(g<br>g <sup>-1</sup> h <sup>-1</sup> ) | <sup>e</sup> Q <sub>B</sub> (g<br>g <sup>-1</sup> ) | Ref       |
|-----|------------------------------------------------------------------------------|----------------------------------------------------|--------------------|---------------------------------|----------------------------------------------------------|-----------------------------------------------------|-----------|
| 1   | Na <sub>2</sub> CO <sub>3</sub> /PCNs                                        | 2500                                               | 25                 | 1                               | 45                                                       | 10.7                                                | This work |
| 2   | Alkaline graphene aerogels                                                   | 1000                                               | 30                 | 1                               | 75                                                       | 3.19                                                | 4         |
| 3   | Na <sub>2</sub> CO <sub>3</sub> /Nitrogen-doped mesoporous carbon nanosheets | 1000                                               | RT                 | 2                               | 375                                                      | 1.37                                                | 6         |
| 4   | Alkaline carbon nanotubes                                                    | 1000                                               | 30                 | 1                               | 112.5                                                    | 1.51                                                | 7         |
| 5   | Alkaline mesoporous carbon spheres                                           | 1000                                               | 30                 | 1                               | /                                                        | 2.46                                                | 8         |
| 6   | Alkaline mesoporous carbon                                                   | 1000                                               | 25                 | 1                               | 75                                                       | 2.65                                                | 9         |
| 7   | Na <sub>2</sub> CO <sub>3</sub> /carbon aerogels                             | 1000                                               | 30                 | 1                               | /                                                        | 1.61                                                | 10        |
| 8   | CuFe <sub>2</sub> O <sub>4</sub> /AC                                         | 1000<br>0                                          | RT                 | 21                              | /                                                        | 0.67                                                | 11        |
| 9   | MgO/rGO                                                                      | 1000                                               | 30                 | 1                               | 75                                                       | 3.11                                                | 12        |
| 10  | IAC                                                                          | 600                                                | 30                 | 0.12                            | 6                                                        | 0.42                                                | 13        |
| 11  | Nitrogen-rich mesoporous carbons                                             | 1000                                               | 30                 | /                               | 37.5                                                     | 2.77                                                | 14        |

<sup>a</sup>H<sub>2</sub>S concentration in the inlet gas. <sup>b</sup>Reaction temperature. <sup>c</sup>O<sub>2</sub> concentration in the inlet gas.

$$WHSV = \frac{F \cdot \rho_{gas}}{m_{cat}}$$

<sup>d</sup>Weight hourly space velocity, calculated by  $WHSV = \frac{F \cdot \rho_{gas}}{m_{cat}}$ , where F is the flow rate (L/h),

$\rho_{gas}$  is the density of inlet gas (g/L), and  $m_{cat}$  is the weight of used catalyst (g). <sup>e</sup>Breakthrough sulfur capacity, g H<sub>2</sub>S/g cat.

## Reference:

- 1 Y. Pan, M. Chen, Z. Su, K. Wu, Y. Zhang and D. Long, Two-dimensional CaO/carbon heterostructures with unprecedented catalytic performance in room-temperature H<sub>2</sub>S oxidization, *Applied Catalysis B: Environmental*, 2021, **280**, 119444.
- 2 Y. Zou, W. Li, L. Yang, F. Xiao, G. An, Y. Wang and D. Wang, Activation of peroxymonosulfate by sp<sup>2</sup>-hybridized microalgae-derived carbon for ciprofloxacin degradation: Importance of pyrolysis temperature, *Chemical Engineering Journal*, 2019, **370**, 1286-1297.
- 3 Y. Li, Y. Lin, Z. Xu, B. Wang and T. Zhu, Oxidation mechanisms of H<sub>2</sub>S by oxygen and oxygen-containing functional groups on activated carbon, *Fuel Processing Technology*, 2019, **189**, 110-119.
- 4 Y. Pan, M. Chen, M. Hu, M. Tian, Y. Zhang and D. Long, Probing the room-temperature oxidative desulfurization activity of three-dimensional alkaline graphene aerogel, *Applied Catalysis B: Environmental*, 2020, **262**, 118266.
- 5 Y. Yuan, L. Huang, T. C. Zhang, L. Ouyang and S. Yuan, One-step synthesis of ZnFe<sub>2</sub>O<sub>4</sub>-loaded biochar derived from leftover rice for high-performance H<sub>2</sub>S removal, *Separation and Purification Technology*, 2021, **279**.

- 6 Z. Yu, X. Wang, Y. Hou, X. Pan, Z. Zhao, and J. Qiu, Nitrogen-doped mesoporous carbon nanosheets derived from metal-organic frameworks in a molten salt medium for efficient desulfurization, *Carbon*, 2017, **117**, 376-382.
- 7 Q. Chen, J. Wang, X. Liu, X. Zhao, W. Qiao, D. Long, and L. Ling, Alkaline carbon nanotubes as effective catalysts for H<sub>2</sub>S oxidation, *Carbon*, 2011, **49**, 3773-3780.
- 8 Z. Zhang, J. Wang, W. Li, M. Wang, W. Qiao, D. Long, and L. Ling, Millimeter-sized mesoporous carbon spheres for highly efficient catalytic oxidation of hydrogen sulfide at room temperature, *Carbon*, 2016, **96**, 608-615.
- 9 Z. Zhang, W. Jiang, D. Long, J. Wang, W. Qiao, and L. Ling, A General Silica-Templating Synthesis of Alkaline Mesoporous Carbon Catalysts for Highly Efficient H<sub>2</sub>S Oxidation at Room Temperature, *ACS Applied Materials & Interfaces*, 2017, **9**, 2477-2484.
- 10 Q. Chen, J. Wang, X. Liu, Z. Li, W. Qiao, D. Long, and L. Ling, Structure-dependent catalytic oxidation of H<sub>2</sub>S over Na<sub>2</sub>CO<sub>3</sub> impregnated carbon aerogels, *Microporous and Mesoporous Materials*, 2011, **142**, 641-648.
- 11 S. Chen, Y. Guo, J. Zhang, Y. Guo, and X. Liang, CuFe<sub>2</sub>O<sub>4</sub>/activated carbon adsorbents enhance H<sub>2</sub>S adsorption and catalytic oxidation from humidified air at room temperature, *Chemical Engineering Journal*, 2022, **431**, 134097.
- 12 H. Xu, Y. Pan, F. Hu, B. Niu, Y. Zhang, and D. Long, Anti-corrosion MgO nanoparticle-equipped graphene oxide nanosheet for efficient room-temperature H<sub>2</sub>S removal, *Journal of Materials Chemistry A*, 2022, **10**, 18308-18321.

- 13 Y. Xiao, S. Wang, D. Wu, and Quan Yuan, Catalytic oxidation of hydrogen sulfide over unmodified and impregnated activated carbon, *Separation and Purification Technology*, 2008, **59**, 326-332.
- 14 F. Sun, J. Liu, H. Chen, Z. Zhang, W. Qiao, D Long, and L. Ling, Nitrogen-Rich Mesoporous Carbons: Highly Efficient, Regenerable Metal-Free Catalysts for Low-Temperature Oxidation of H<sub>2</sub>S, *ACS Catalysis*, 2013, **3**, 862–870.
